# Supplementary material
Source: PubMed Central journal article supplement (PMC10181965)
Supplement: 101_2023_1269_MOESM1_ESM.pdf [file 101_2023_1269_MOESM1_ESM.pdf]

**Zusatzmaterial zum Beitrag** „Evaluation des Projektes „TeleCOVID Hessen“ nach einjährigem Betrieb“ von Brandt J, Albert M, Gramminger S et al. (2023) in *Die Anaesthesiologie*

Beitrag und Zusatzmaterial stehen Ihnen auf [www.springermedizin.de](http://www.springermedizin.de) zur Verfügung. Bitte geben Sie dort den Beitragstitel in die Suche ein.

---

## Fragebogen zur Studie

### Einleitungsfragen

#### **Welche Kategorie trifft auf Ihr Krankenhaus zu?**

- Krankenhaus der Basisnotfallversorgung
- Krankenhaus der erweiterten Notfallversorgung
- Krankenhaus der umfassenden Notfallversorgung (Kein koordinierendes Krankenhaus)
- Krankenhaus der umfassenden Notfallversorgung (Koordinierendes Krankenhaus)
- Krankenhaus der speziellen Notfallversorgung
- Keine Teilnahme an der Notfallversorgung (z.B. Reha-Klinik)

#### **Haben Sie die TeleCOVID Hessen App genutzt?**

- JA → Weiter mit Fragebogen 1
- NEIN → Weiter mit Fragebogen 2

### Fragebogen 1

#### **Wie häufig haben Sie die TeleCOVID Hessen App durchschnittlich geöffnet und/oder genutzt?**

- Täglich
- Mehrmals wöchentlich
- 1 bis 5x pro Monat
- Weniger als 1x pro Monat

#### **Mit welchen Einrichtungen hatten Sie über die TeleCOVID-App Kontakt?**

**(Mehrfachauswahl möglich)**

- Krankenhaus der Basisnotfallversorgung
- Krankenhaus der erweiterten Notfallversorgung

Fragebogen zur Evaluation der TeleCOVID Hessen App, entworfen von J. Brandt und F. Hoffmann, Stand 02/2022

- Krankenhaus der umfassenden Notfallversorgung (Kein koordinierendes Krankenhaus)
- Krankenhaus der umfassenden Notfallversorgung (Koordinierendes Krankenhaus)
- Krankenhaus der speziellen Notfallversorgung
- Keine Teilnahme an der Notfallversorgung (z.B. Reha-Klinik)

**Aus welchem Grund haben Sie die TeleCOVID-App am häufigsten genutzt?**

- Verlegungsanfrage an anderes Krankenhaus
- Verlegungsanfrage von anderem Krankenhaus
- Therapiebesprechung ohne Verlegungsanfrage

**Falls Sie Verlegungsanfragen an ein anderes Krankenhaus gerichtet haben, welche medizinischen Gründe lagen dem zugrunde?**

- Therapie in Krankenhaus einer höheren Versorgungsstufe erforderlich
- Heimatnahe Rückverlegung
- ECMO-Therapie erforderlich
- Kapazitätsmangel
- Andere Gründe

**Hat die Kommunikation technisch störungsfrei funktioniert?**

- Ja
- Nein

**Falls Sie „Nein“ angegeben haben, welche Störungen sind aufgetreten?**

Freitextfeld

**Welche Vorteile hatte die Kommunikation gegenüber gängigen Kommunikationsmitteln (Telefon, Mobiltelefon, Fax)?**

Freitextfeld

**Welche Nachteile hatte die Kommunikation gegenüber gängigen Kommunikationsmitteln (Telefon, Mobiltelefon, Fax)?**

Freitextfeld

**Haben Sie Verlegungen von Covid-Patienten über die TeleCOVID Hessen App organisiert?**

- Ja
- Nein

**Konnte durch die Nutzung von TeleCOVID die Verlegung Patient:innen verhindert werden?**

- Ja
- Nein

**Würden Sie die TeleCOVID Hessen App gerne weiter benutzen?**

- Ja
- Nein

**Wenn NEIN: Was müsste sich verbessern, um eine Weiternutzung attraktiv zu machen?**

Freitextfeld

**Danke für die Teilnahme.**

## [Fragebogen 2](#)

**Was hat Sie davon abgehalten, TeleCOVID zu nutzen?**

Freitextfeld

**Was müsste sich verbessern, um eine Nutzung künftig attraktiv zu machen?**

Freitextfeld

**Danke für die Teilnahme.**
